# Supplementary material
Source: PubMed Central journal article supplement (PMC4425988)
Supplement: NIHMS673722-supplement-6.pdf [file NIHMS673722-supplement-6.pdf]

**A**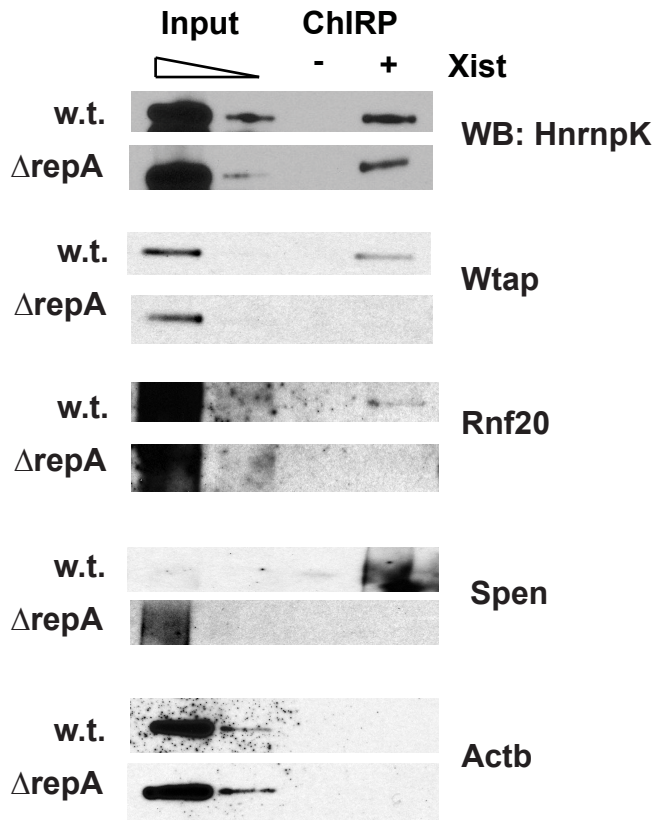**B**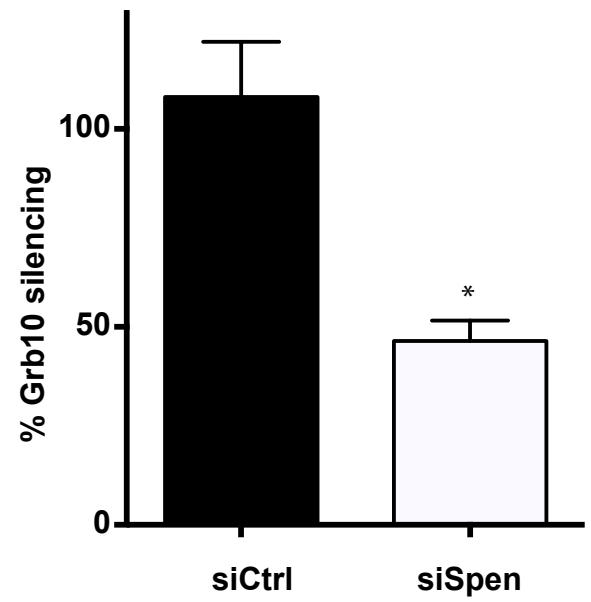**C**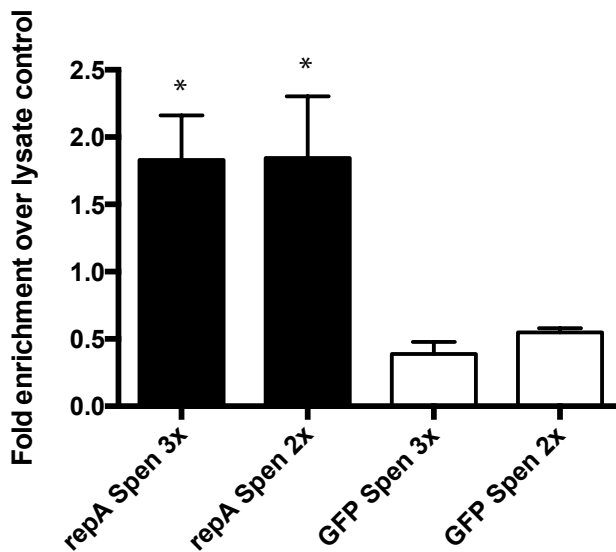**D**

| Protein      | log2 fold change (mESC/mEpiSC) |
|--------------|--------------------------------|
| Hmgb1        | -0.320069586                   |
| Ilf2         | -0.224470293                   |
| Xrn2         | -0.545862681                   |
| Poldip3      | -0.268898111                   |
| <b>Rnf20</b> | <b>-1.967368996</b>            |
| Fubp3        | 0.299688356                    |
| Hnrpll       | -0.680708128                   |
| Ilf3         | 0.18088126                     |
| Ssb          | -0.326204627                   |
| Srrt         | -0.084844044                   |
| Eif4a3       | 0.117427421                    |
| Rnmt         | -0.219069282                   |
| <b>Ptbp2</b> | <b>-1.941217567</b>            |
| Wtap         | 0.061520353                    |
| Khdrbs1      | 0.102517323                    |
| Sap18        | N.D.                           |
| Spen         | N.D.                           |
