# Supplementary material
Source: PubMed Central journal article supplement (PMC4425988)

**A**

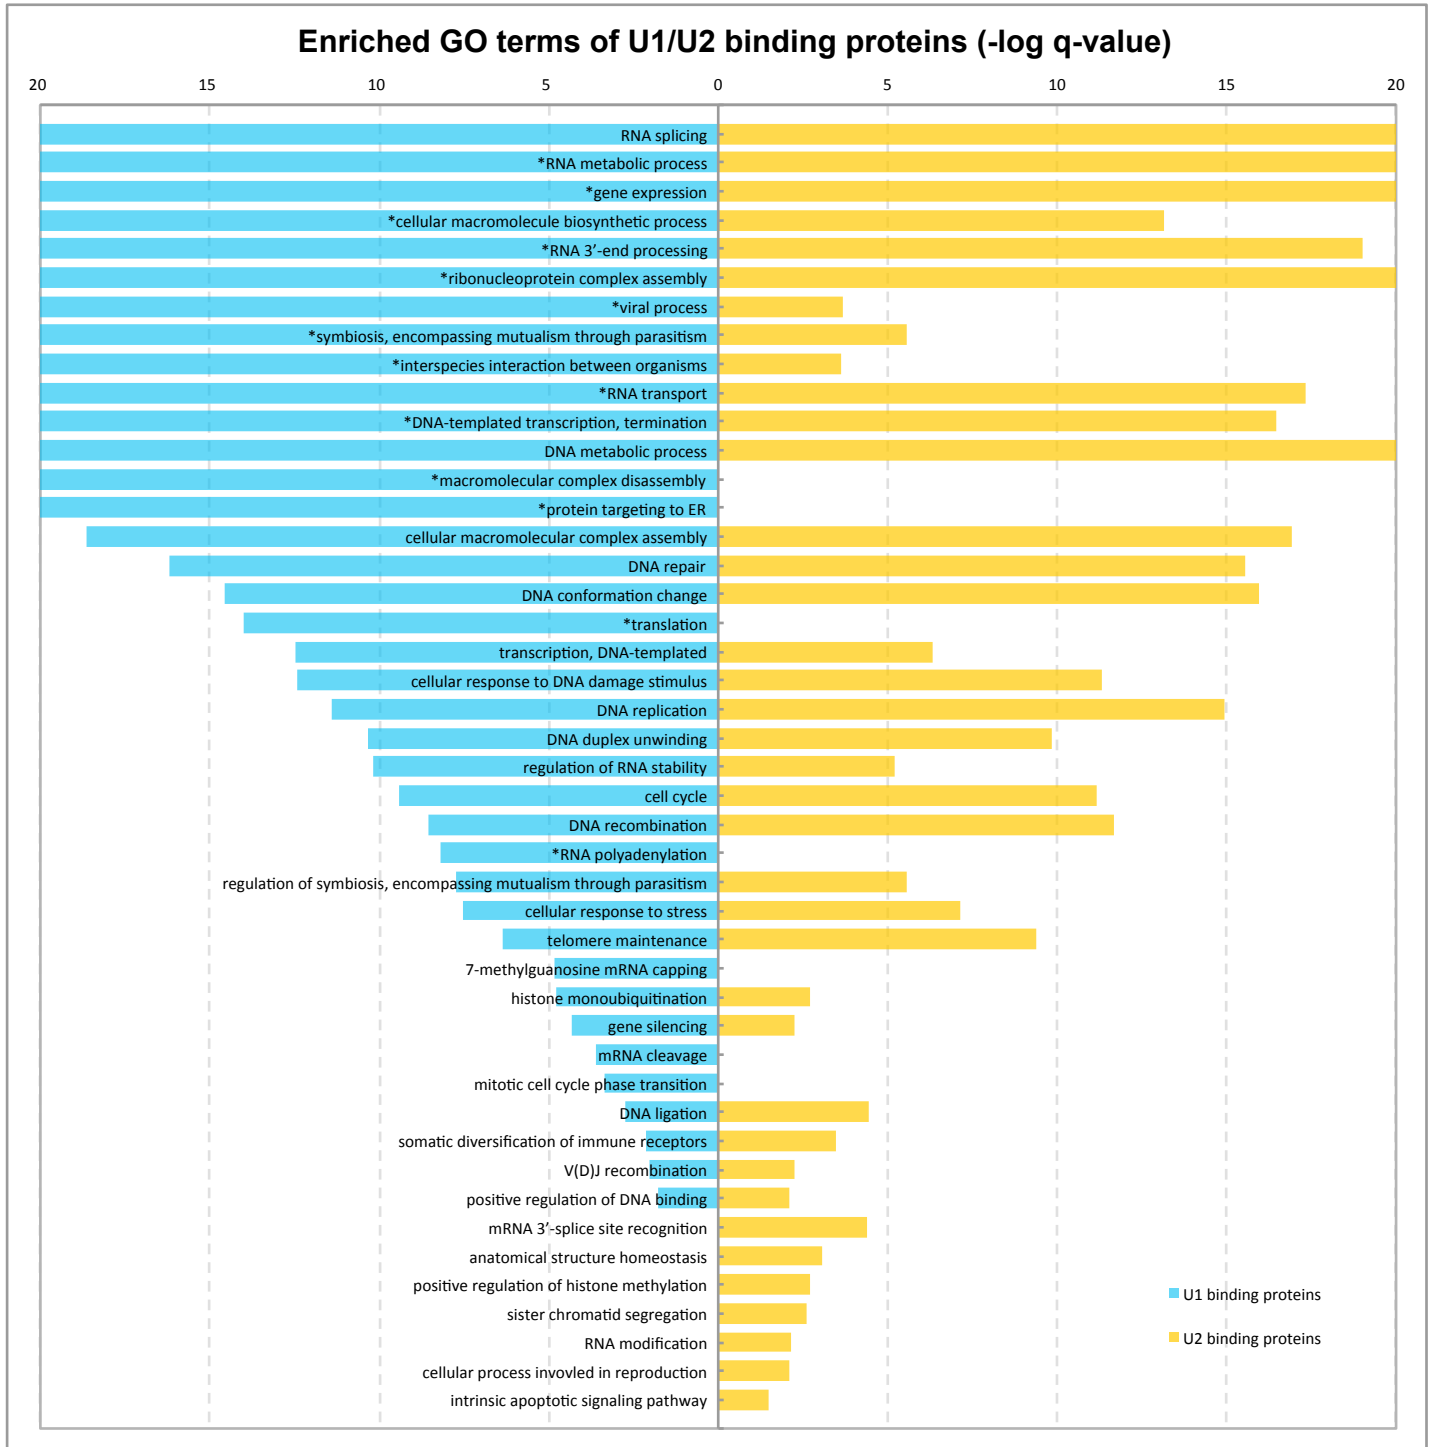

**B**

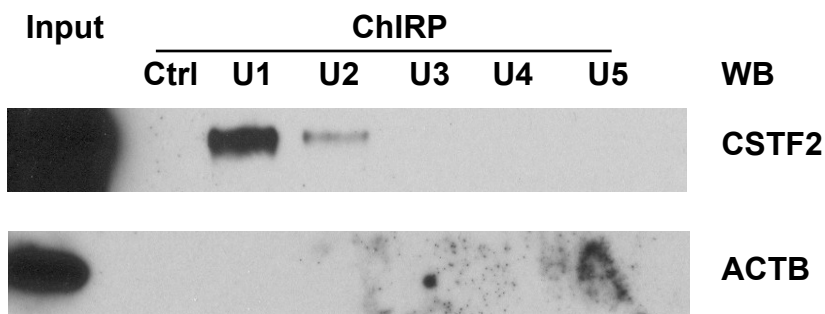

Supplement: NIHMS673722-supplement-1.pdf [file NIHMS673722-supplement-1.pdf]

**A**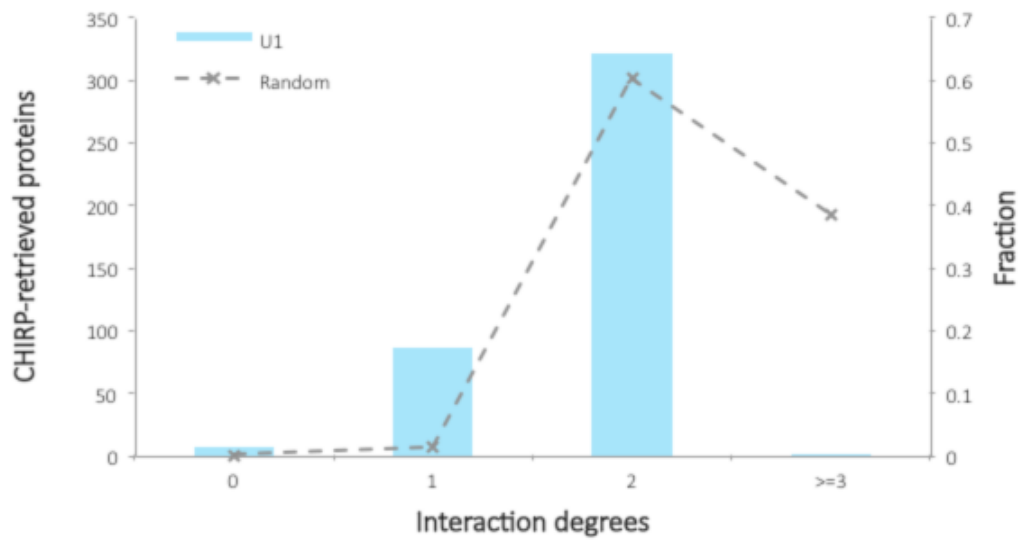**B**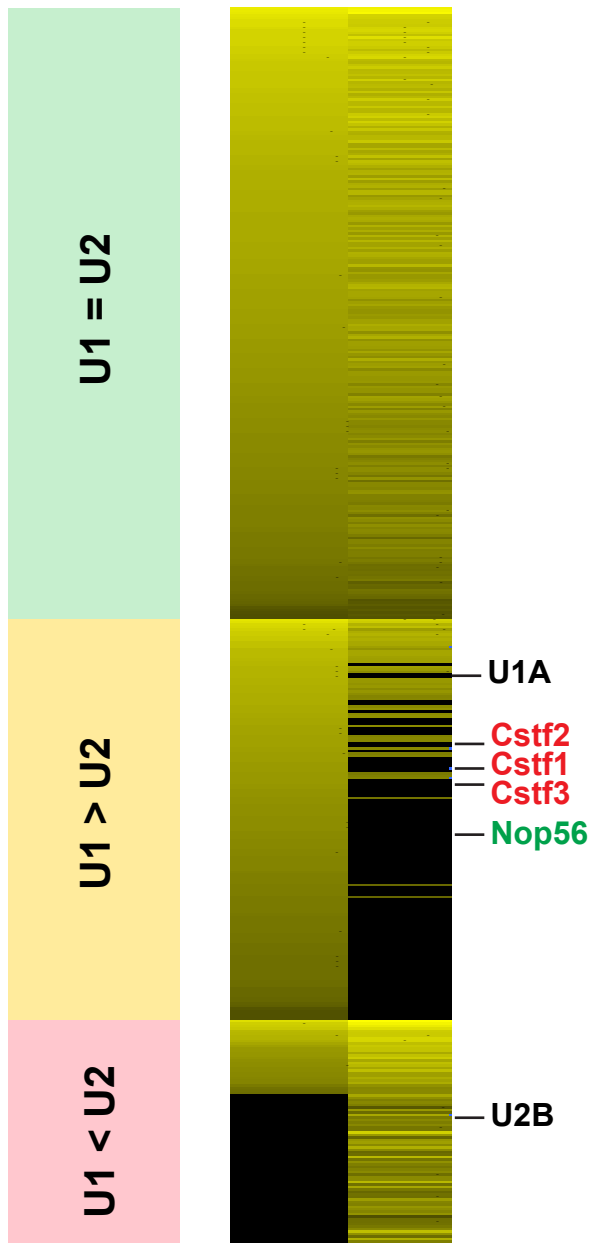**C**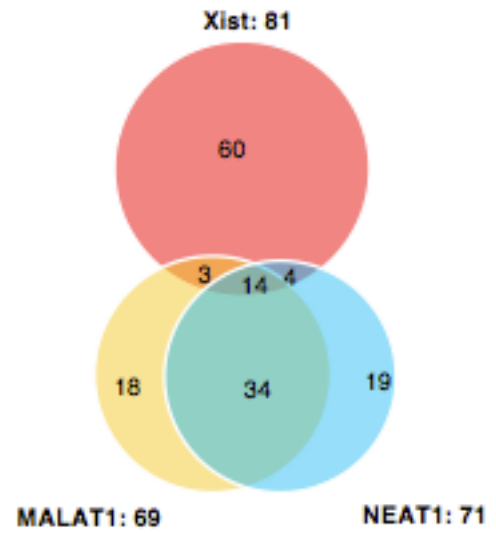

Supplement: NIHMS673722-supplement-2.pdf [file NIHMS673722-supplement-2.pdf]

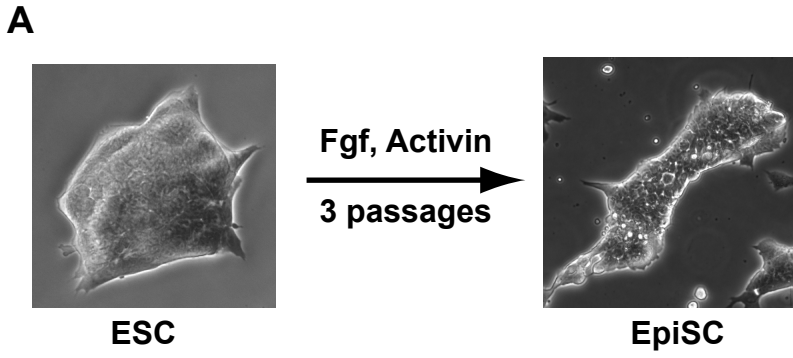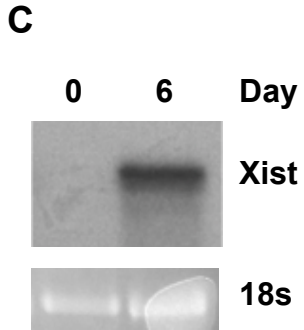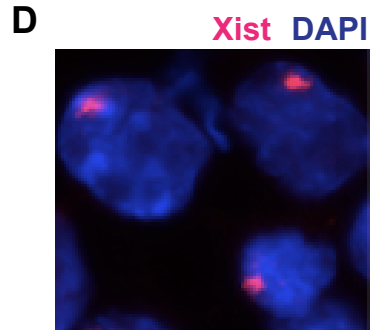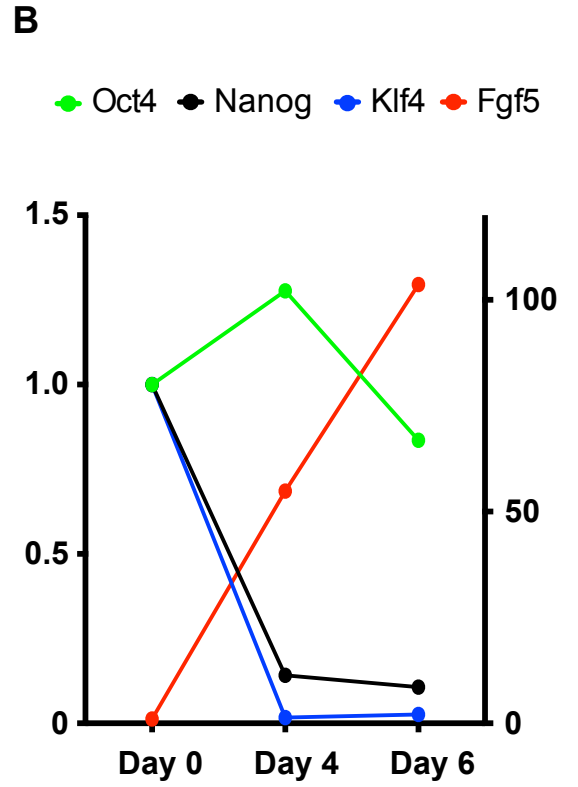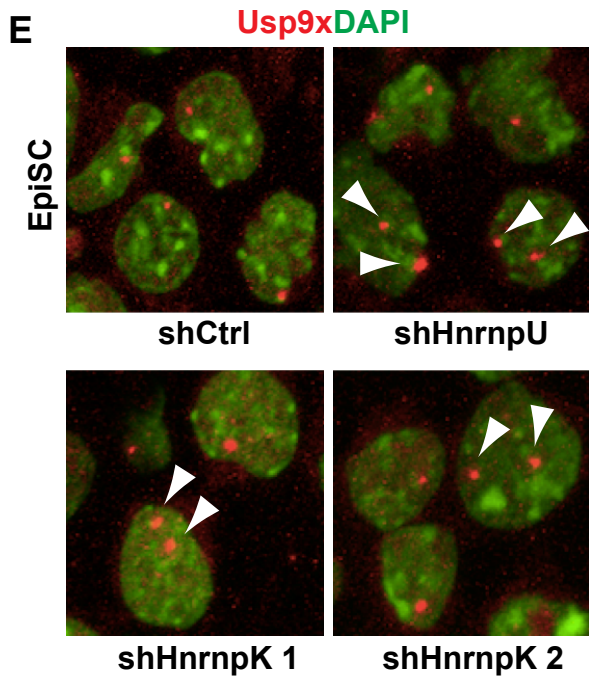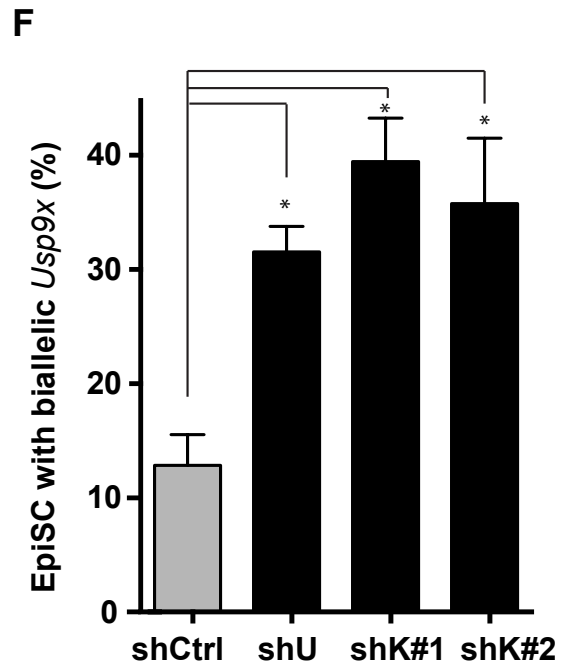

Supplement: NIHMS673722-supplement-3.pdf [file NIHMS673722-supplement-3.pdf]

**A**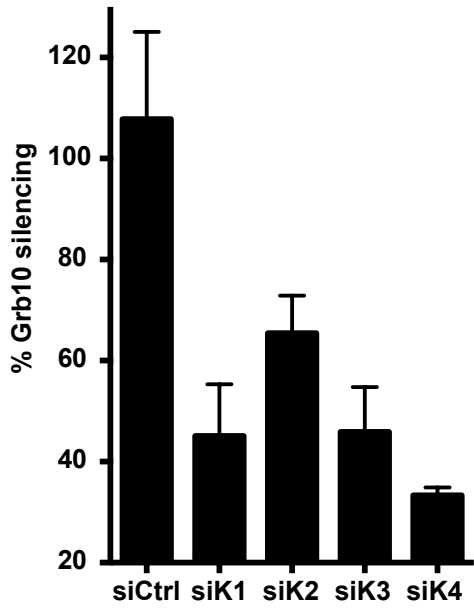**B**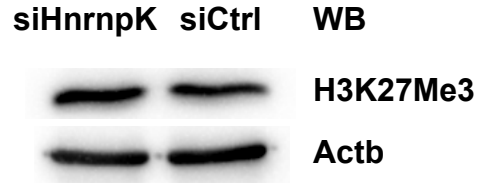**C**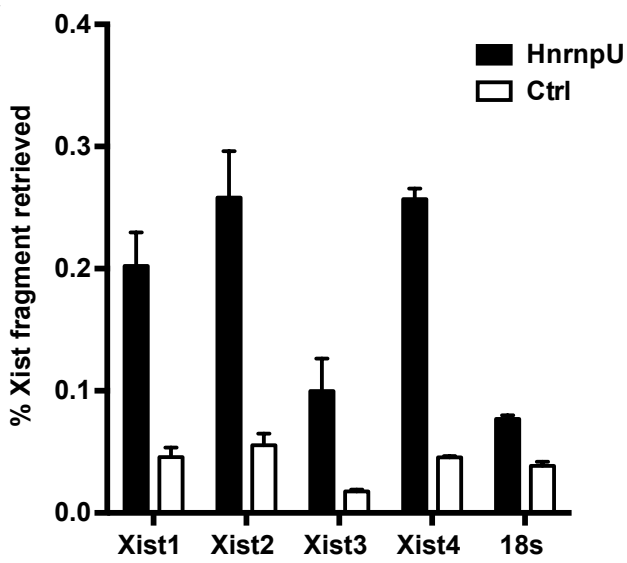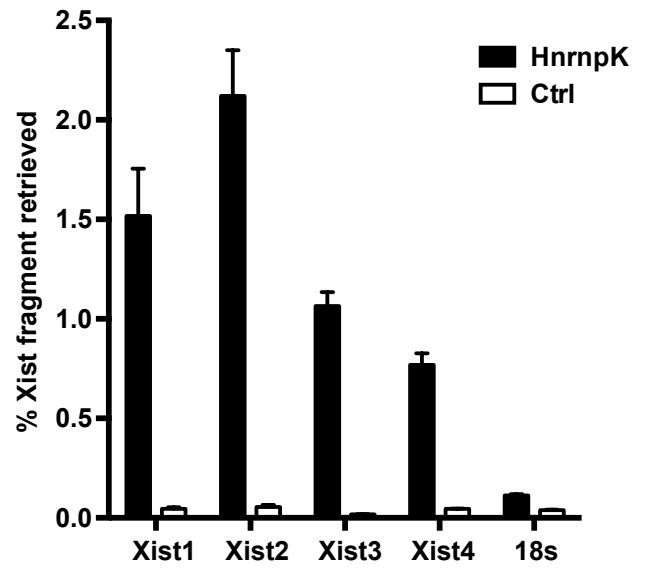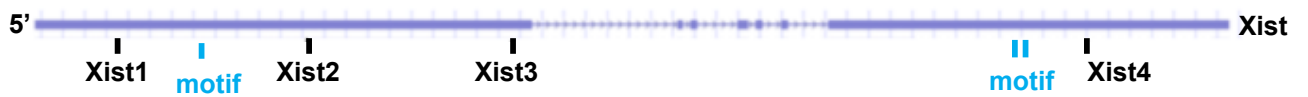

Supplement: NIHMS673722-supplement-4.pdf [file NIHMS673722-supplement-4.pdf]

siCtrl

siHnrnpK

Xist

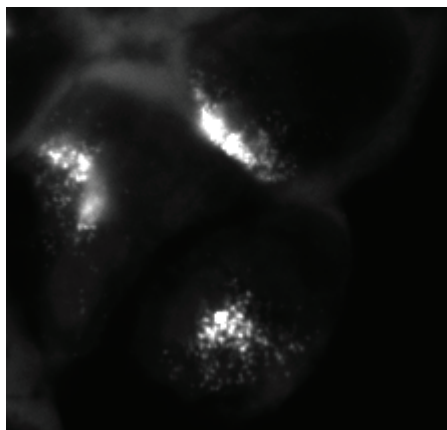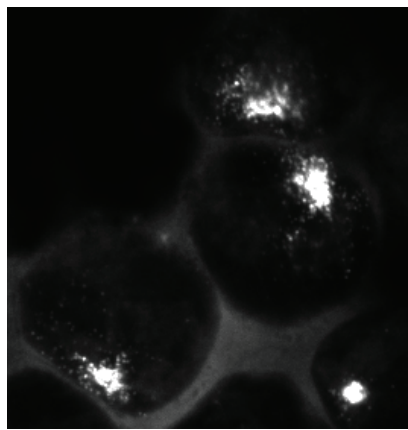

EED

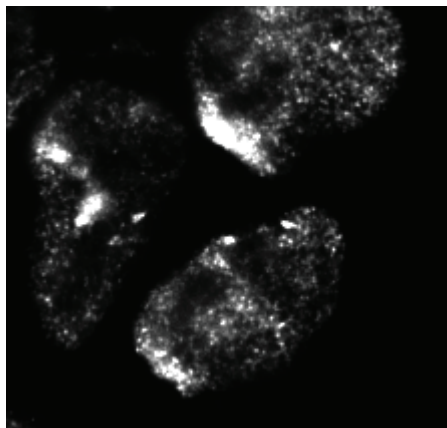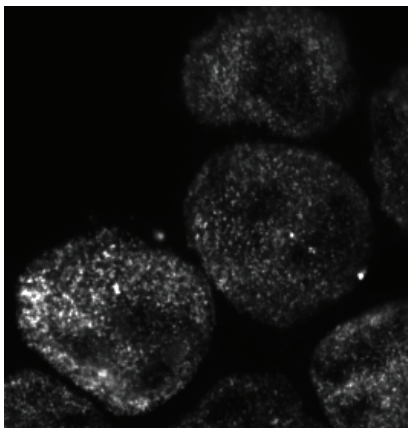

DAPI

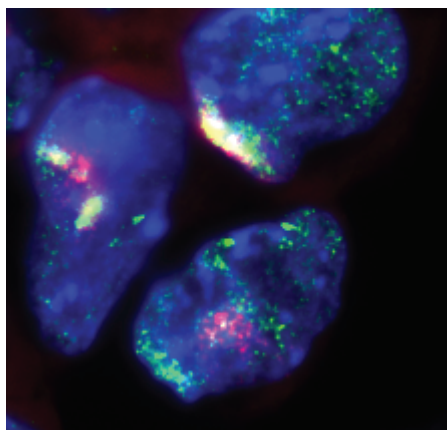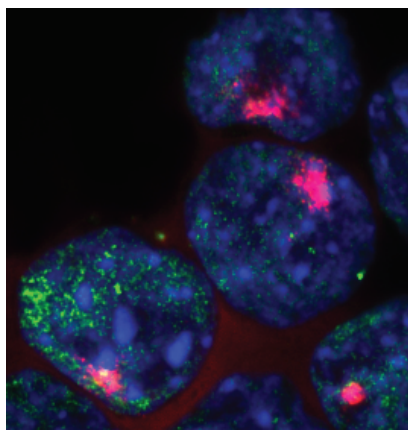

Xist

EED

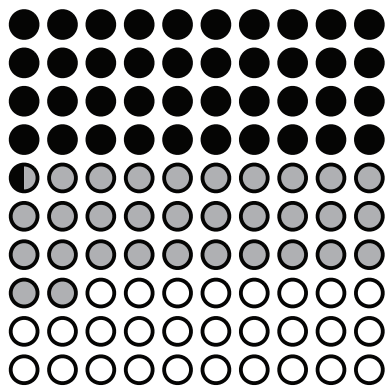

Total=72

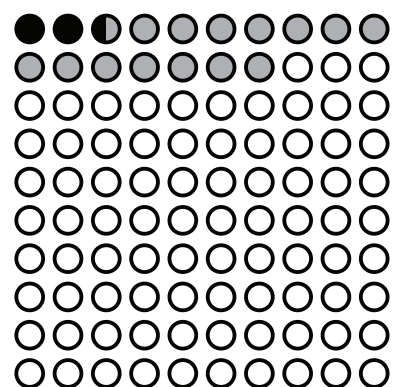

Total=82

■ Strong  
 ■ Weak  
 □ Nil

Supplement: NIHMS673722-supplement-5.pdf [file NIHMS673722-supplement-5.pdf]
